# 1 **Engineering orthogonal ribosomes for real-time monitoring using** 2 **fluorescence**

3 Eszter Csibra<sup>1,\*</sup>, Bjarne Klopprogge<sup>2,#</sup>, Georgie Hau Sørensen<sup>3,#</sup>, Thomas E. Gorochowski<sup>3,4,\*</sup>

4 <sup>1</sup> Department of Bioengineering, Imperial College Centre for Synthetic Biology, Imperial  
5 College London, London, UK

6 <sup>2</sup> Institute of Biochemistry and Molecular Biology, University of Hamburg, Hamburg, Germany

7 <sup>3</sup> School of Biological Sciences, University of Bristol, 24 Tyndall Avenue, Bristol, UK

8 <sup>4</sup> BrisEngBio, School of Chemistry, University of Bristol, Cantock's Close, Bristol, UK

9 # Equal contribution

10 \* Correspondence should be addressed to E.C. ([e.csibra@imperial.ac.uk](mailto:e.csibra@imperial.ac.uk)) and T.E.G.

11 ([thomas.gorochowski@bristol.ac.uk](mailto:thomas.gorochowski@bristol.ac.uk))

## 12 **Abstract**

13 A promising route to tackle the trade-off in cellular resources between synthetic protein  
14 production and cellular growth is to use a separate dedicated pool of orthogonal ribosomes to  
15 produce synthetic proteins. However, the optimisation of strains containing two ribosomal  
16 pools – native for the host cell's proteome and orthogonal for synthetic proteins – has yet to  
17 be thoroughly explored. Here, we address this by creating orthogonal ribosomes that fluoresce  
18 by inserting fluorescent RNA aptamers into tethered orthogonal ribosomal RNA (TO-rRNA).  
19 To study the tolerance of the engineered ribosomes to aptamer insertion, we assembled and  
20 screened a library of candidate insertion sites, identifying several sites in both the 16S and  
21 23S TO-rRNA that enables ribosome labelling with minimal effect on translation activity.  
22 Serendipitously, we identify one site in 23S TO-rRNA, where insertion appears to not only be  
23 tolerated but to enhance orthogonal ribosome activity, across multiple bacterial strains and  
24 RNA insertions. Using bulk and single cell assays, we demonstrate that this variant allows us  
25 to label orthogonal ribosomes for dynamic tracking and across populations, making it a  
26 promising tool for optimising orthogonal translation in engineered cells. Ribosome engineering  
27 offers great potential, both for the development of next-generation microbial cell factories, as  
28 well as a tool to expand our understanding of ribosome function in living cells. This work  
29 provides a window into the assembly, localisation and function of these molecular machines  
30 to meet these aims.

31 **Keywords:** ribosome, translation, fluorescence, aptamer, biometrology, synthetic biology.

## 32 Introduction

33 Proteins form both key structural elements in cells and power many of the biochemical and  
34 biophysical processes essential for life. This central role has led to the control of protein  
35 expression, and particularly the translation of protein from messenger RNA (mRNA) by  
36 ribosomes, becoming a fundamental part of bioengineering efforts (Green et al. 2014; Mutalik  
37 et al. 2013; Salis et al. 2009; Zhao et al. 2022). In this context, one of the most interesting  
38 developments over the last decade has been the discovery and optimisation of systems that  
39 allow for the generation of a second pool of ribosomes within engineered *Escherichia coli* cells  
40 (Liu et al. 2018). Many these systems have been facilitated by two key innovations: orthogonal  
41 translation initiation and tethered ribosomal RNA (Fried et al. 2015; Orelle et al. 2015;  
42 Rackham & Chin 2005). The tethered orthogonal (TO-) rRNAs contain an orthogonal anti-  
43 Shine Dalgarno sequence in the 16S rRNA that allows them to direct the translation of mRNA  
44 constructs bearing orthogonal Shine Dalgarno sequences (oSDs, alternatively known as  
45 orthogonal ribosome binding sites, oRBSs), while the attachment of the 16S and 23S rRNAs  
46 enables 23S rRNA to be mutated without dominant negative phenotypes caused by native  
47 and orthogonal subunit mixing.

48 The field of synthetic biology has seen growing interest in using TO-ribosomes as a  
49 basis for engineering cells to contain two ribosome pools: a native pool for performing  
50 translation of the host proteome, and an orthogonal pool made up of TO-ribosomes for  
51 translating synthetic proteins that may need to be regulated in a different way to endogenous  
52 processes (Liu et al. 2018). Using this approach it has been shown that it is possible to  
53 decouple the translation of synthetic genes from fluctuations in native ribosome availability  
54 and more reliability control gene expression (Darlington et al. 2018). While a promising  
55 approach, relatively little is known about the fate of TO-ribosomes in engineered *E. coli* cells,  
56 specifically in terms of their production, assembly and localisation. Furthermore, the use of  
57 TO-ribosomes is currently constrained by limited protein production yields compared to native  
58 translation (Carlson et al. 2019). However, it has been observed that TO-ribosome function  
59 may be improved by attention to ribosome assembly and subunit mixing (Aleksashin et al.  
60 2019; Kolber et al. 2021; Schmied et al. 2018), suggesting that knowledge of the cellular fate  
61 of engineered rRNAs may be a productive route to enable their optimisation for *in vivo*  
62 applications.

63 Accurate quantification of endogenous and engineered cellular processes, like protein  
64 translation, has also seen growing importance in synthetic biology. This stems from the need  
65 for measurements of the concentrations and rates of biochemical components to develop  
66 predictive models that can better guide bioengineering efforts (Ahn-Horst et al. 2022; Farasat  
67 et al. 2014; Muldoon et al. 2021; Nielsen et al. 2016; Schreiber et al. 2016). Without such

68 models, designing large and complex biological systems is near impossible, hampering our  
69 ability to tackle important challenges in the field. In this regard, recent work has demonstrated  
70 that the careful use of sequencing-based methods (Espah Borujeni et al. 2020; Gorochoowski  
71 et al. 2017, 2019) can provide a more holistic and quantitative picture of large genetic systems,  
72 allowing us to optimise their function more effectively by pinpointing points of failure. Similarly,  
73 it has been shown that accurate counts of protein copy numbers in engineered cells can be  
74 extracted from bulk fluorescence measurements (Csibra & Stan 2022), and furthermore, that  
75 it is in principle possible to infer absolute molecule counts for any fluorophore (Csibra and  
76 Stan, manuscript in preparation). Single-molecule approaches have also provided detailed  
77 insights into DNA (e.g., plasmid), RNA and protein counts and localisation within living cells  
78 (Bienko et al. 2013; Cai et al. 2006; Raj et al. 2008; Raj & van Oudenaarden 2009; Shao et  
79 al. 2021). Such developments demonstrate the wide range of tools now at our disposal to  
80 study how components like the TO-ribosomes might function and become integrated into  
81 engineered cellular systems.

82 In this work, we develop methods to tag and quantify TO-ribosomes via the attachment  
83 of a fluorescent RNA aptamer (**Fig. 1**). While native 5S and 16S rRNAs have been tagged  
84 with fluorescent RNA aptamers before (Filonov et al. 2014; Okuda et al. 2017), 23S and TO-  
85 rRNAs have not, and we provide the first comprehensive study that aims to identify functional  
86 insertion sites throughout a TO-ribosome. To validate the utility of our TO-ribosome variants,  
87 we screened them for both the maintenance of ribosomal function by measuring protein  
88 translation activity from an oSD reporter, and aptamer folding efficiency by quantifying  
89 fluorescence in the presence of the aptamer's cognate dye. We also assessed the ability for  
90 fluorescence signals from our tagged TO-ribosomes to be monitored using plate readers and  
91 flow cytometry across *E. coli* strains and growth conditions. Our results provide a step towards  
92 the accurate quantification of TO-ribosome abundance in cells and allow for the optimisation  
93 of TO-ribosome generation by illuminating its abundance across time (dynamics) and space  
94 (localisation), as well as cell populations.

95

## 96 **Results**

### 97 ***Designing a TO-ribosome insertion library***

98 To build a fluorescently labelled orthogonal ribosome that can be used to monitor orthogonal  
99 translation in real-time in living cells, we first needed to establish which sites in the TO-rRNA  
100 are permissive to small RNA insertions. We used two complementary methods to identify  
101 candidate sites for this purpose – one based on structural features of the ribosome and the  
102 other using sequence information (**Fig. 2**).

103 Previous efforts to circularly permute rRNA indicated 23 possible insertion sites within  
104 the 23S rRNA that may allow translational activity to be maintained (Orelle et al. 2015). We  
105 began by assessing the biochemical environment of each of these sites using structural  
106 information from cryo-EM structures of native *E. coli* ribosomes (PDB: 4V9D). First, all sites  
107 with nucleotides involved in base pairing were discarded. Second, the distance to the closest  
108 residue, which is not part of the same loop/helix, was measured. Third, the overall position  
109 within the ribosomal structure was assessed. In total, five of the 23 sites (23S  
110 U62, U546, A1583, C1870 and U2797) located in superficial loops were selected for testing  
111 (**Fig. 2a**, left hand panel).

112 We also performed a multiple sequence alignment of 23S and 16S rRNAs from  
113 *Escherichia* genus isolates using the SILVA rRNA database (Quast et al. 2013) to find  
114 permissive sites. These would be highlighted by the existence of natural insertions present in  
115 organisms related to our model *E. coli* system. Sites where frequent insertions were observed,  
116 as compared to the consensus 16S and 23S sequences, were selected for further testing –  
117 constituting a further ten sites (**Fig. 2a**, middle panel).

118 Finally, four additional sites were selected based on the design of the oRiboT2 tethered  
119 ribosome (Orelle et al. 2015): an insertion site at the 5' terminus (5'), and in each of the linker  
120 regions, i.e., in the T1 and T2 tethers and the connector (**Fig. 2a**, right hand panel). In total,  
121 our designed library contained 19 candidate insertion sites, constituting sites covering both  
122 subunits (**Fig. 2b**).

123

### 124 **Assessing sites at which ribosomes may be functionalised**

125 We built our library by inserting a Broccoli RNA aptamer sequence (Filonov et al. 2014) into  
126 the oRiboT2 tethered orthogonal (TO-) ribosome (Orelle et al. 2015), separately at each of the  
127 19 candidate sites. To test the activity of the resultant TO-ribosome variants, cells were co-  
128 transformed with an orthogonal mCherry reporter construct (containing an orthogonal SD) to  
129 assess the performance of the variants compared to the 'wild-type' (WT) parental TO-  
130 ribosome (**Fig. 3a**). Most of the candidate sites retained over half of their activity, and we  
131 observed a strong correlation between the two tested strains, DH10B and BL21(DE3) (**Fig.**  
132 **3b** and **Supplementary Fig. 1**). We observed a higher rate of permissiveness from sites in  
133 the 23S rRNA segments of the TO-rRNA, as opposed to the 16S segments. However, we  
134 would need to expand the library size to investigate whether this is a general trend. All of the  
135 linker regions supported translation activity, with the connector site, C, that was used to attach  
136 the 5' and 3' ends of the 23S rRNA for permutation (Orelle et al. 2015), performing better than  
137 the tethered regions. We later found that two of the sites that performed well (23S U1174 and  
138 C2145) had been previously utilised for the insertion of protein-binding tags for ribosome  
139 purification (Matadeen et al. 2001 p. 2008; Yokoyama & Suzuki 2008), showing we could

140 recapitulate positive results previously obtained by others. A remaining set of 6 insertion sites  
141 (16S 5', U209, U652, and 23S U546, C888, A1583, C1870) that we can identify as retaining  
142 high levels of translation activity (that is >80% in BL21(DE3) and >65% in DH10B) have not,  
143 to our knowledge, been previously tested as candidate sites for insertion tolerance, and we  
144 therefore identify for the first time as effective sites for ribosome engineering.

145 Curiously, another site used previously for ribosome isolation (23S U2797, in the apex  
146 loop of 23S helix H98) (Ali et al. 2006; Matadeen et al. 2001; Shi et al. 2012; Youngman et al.  
147 2004; Youngman & Green 2005), was not identified as one of our highest performing variants.  
148 Because few of these previous studies conducted comparative analyses similar to ours, it  
149 remains possible that this site is not one of the best sites for isolation, given a comprehensive  
150 screen. Nonetheless, it remains interesting that other groups have identified this site as  
151 functional for the purposes of ribosome activity assays in cell free assays, given its position in  
152 its ranking as one of the least effective of our tested sites in DH10B cells (**Supplementary**  
153 **Fig. 1b**). This suggests that most of our tested sites may be useful for studies in which a small  
154 degree of reduced functionality may be tolerated. Alternatively, there may be differences  
155 between the functional implications of inserted RNA sequences *in vitro* and *in vivo*, or between  
156 native and tethered ribosomes, that have yet to be explored.

157

### 158 **Exploration of the translation enhancing 23S C888 site**

159 Insertion of the Broccoli aptamer at the 23S C888 site revealed the most striking data from  
160 our library. The 23S C888 site performed strongly in both strains and reliably exceeding the  
161 translation activity of the parental WT ribosome in BL21(DE3) cells. For this reason, it was  
162 selected for further testing. All subsequent experiments were carried out in DH10B cells using  
163 our pSEVA361 based reporters. This reporter system has the advantage of having been  
164 thoroughly characterised from our earlier work, and is part of a library of fluorescent protein  
165 reporters (Csibra & Stan 2022).

166 First, we checked whether the high activity of the C888 variant was maintained across  
167 multiple reporters by testing its activity on an alternative fluorescent protein reporter construct  
168 containing an upstream orthogonal SD site and normalised its result to the parental TO-  
169 ribosome (**Fig. 3c**). This showed that the C888 variant is functional across different reporters,  
170 with 88% activity for mCherry and 101% for mGFPmut3. Next, we asked whether TO-  
171 ribosomes were tolerant to insertions of other RNA sequences at the C888 position. To test  
172 this, we assembled variants containing the Pepper aptamer (Chen et al. 2019) and MS2  
173 binding site (Witherell et al. 1991) and measured the TO-ribosome activity on our mCherry  
174 reporter construct. We found that for all inserts, the TO-ribosome showed excellent activity  
175 that matched or even exceeded the non-modified TO-ribosome (**Fig. 3d**). None of our tests  
176 showed significant impacts on growth rate (**Fig. 3e**), ruling out reduced dilution due to cellular

177 replication as the source of the high protein per cell values. These results suggest that the  
178 C888 position is amenable to a range of RNA insertions with diverse sequences and structures  
179 between 43–71 nt long.

180

### 181 ***The Broccoli RNA aptamer is functional within the rRNA scaffold***

182 Having established that TO-rRNA retains translation activity in the presence of inserted  
183 sequences at position C888, we next asked whether the inserted RNA sequences fold and  
184 function correctly in the context of the TO-rRNA. Fluorescence from the Broccoli RNA aptamer  
185 is reportedly enhanced by placing it in the context of a structured scaffold such as F30 (Filonov  
186 et al. 2015). However, we reasoned that this should not be necessary in the context of a stable  
187 structured RNA such as a TO-rRNA.

188 We tested the functionality of the aptamer by growing cells containing our TO-  
189 ribosomes in the presence of DFHBI-1T (**Fig. 4a**) and monitored green fluorescence alongside  
190 bacterial growth over time in a plate reader. Two constructs were tested: (i) a constitutive  
191 expression construct, based on the original poRiboT2 construct (**Methods**) in DH10B cells,  
192 and (ii) an inducible construct in which the promoter had been replaced with an IPTG-inducible  
193  $P_{tac}$  promoter in DH10B Marionette cells where LacI is expressed from the genome (Meyer et  
194 al. 2019). Broccoli levels per cell were estimated by calculating normalised green fluorescence  
195 over normalised OD700 values, and removing the signal from a paired negative control,  
196 identical to the tested sample with the exception of the Broccoli insertion (**Fig. 4b**). We found  
197 a clear increase in fluorescence signal per cell from cells with Broccoli-functionalised  
198 ribosomes. They also showed expression dynamics consistent with constitutive (**Fig. 4b**; left)  
199 and inducible (**Fig. 4b**; middle and right) systems. This demonstrates that Broccoli is functional  
200 within the TO-rRNA scaffold, without the addition of an F30 scaffold, and that the insertion of  
201 a single Broccoli (rather than a tandem or larger arrays of aptamers) may, in some cases, be  
202 sufficient to study and optimise TO-ribosome expression in living cells.

203

### 204 ***Monitoring TO-ribosome concentration dynamics***

205 Having established that Broccoli labelling allowed us to track labelled ribosomes, we next  
206 asked what Broccoli fluorescence could tell us about the abundance of orthogonal ribosomes  
207 during constitutive expression across a range of growth conditions in widely used *E. coli*  
208 strains.

209 We observed striking differences in ribosome abundance across strain, sugar and  
210 growth phase (**Fig. 5a**). In DH10B cells, constitutive expression resulted in an approximately  
211 2-fold higher level of TO-ribosome abundance per cell in fructose than in glucose-  
212 supplemented media. This suggests that carbon source can affect the production and/or  
213 degradation of TO-ribosomes. In contrast, this pattern was not seen for the BL21(DE3) strain,

214 with similar TO-ribosome concentrations across the carbon sources. Instead, we observed a  
215 prominent effect of growth phase, from log phase levels that are comparable to those of the  
216 DH10B strain grown in fructose, followed by a drop to near zero during stationary phase (**Fig.**  
217 **5a**), a response that was reproducible over multiple experiments.

218 During these experiments, we observed that the bright yellow colour of media  
219 containing DFHBI-1T was preserved after overnight growth in wells containing only media but  
220 appeared diminished in the presence of bacterial cultures. If DFHBI-1T was degrading over  
221 an extended time course assay, this may partly explain the decrease in Broccoli signals we  
222 observed in the BL21(DE3) cultures. Using a method adapted from the absorbance-based  
223 fluorescent protein quantification assay (Csibra & Stan 2022) (see **Methods**), we tracked  
224 DFHBI-1T levels across DH10B and BL21(DE3) cultures at a range of starting concentrations  
225 (**Fig. 5b** and **Supplementary Fig. 2**). While it is difficult to track high concentrations of DFHBI-  
226 1T due to the sum of the absorbance from the cell and the label being too high to quantify and  
227 leading to missing values in the data (**Supplementary Fig. 2**, 200 $\mu$ M), it is possible to track  
228 lower concentrations accurately. It is clear from this data that DFHBI-1T concentrations drop  
229 over time for both strains, but that the drop is more pronounced for BL21(DE3). Nonetheless,  
230 we observe that DFHBI-1T is stable in DH10B cultures during the first 6 hours of log phase  
231 growth allowing for extended monitoring of TO-ribosome concentrations over time.

232 To investigate ribosome abundance using a method that does not require continuous  
233 incubation of DFHBI-1T over several hours, we turned to flow cytometry to validate our plate  
234 reader results. Using DH10B cells grown in fructose-supplemented M9, cultures were grown  
235 identically to plate reader cultures, but without the addition of DFHBI-1T, and aliquots were  
236 removed at two timepoints for flow cytometric analysis with DFHBI-1T. The flow cytometry data  
237 recapitulates the approximately 2-fold decrease in ribosome abundance between fructose-  
238 and glucose- supplemented cultures (**Fig. 5c**, supporting the notion that carbon source affects  
239 orthogonal ribosome abundance through either production and/or degradation rate differences  
240 in DH10B cells.

241

### 242 ***Optimising reporters for measurement of orthogonal ribosome activity***

243 Throughout these experiments, we observed varying background expression levels of our  
244 oSD reporters by native ribosomes in strains not harbouring orthogonal ribosome vectors. In  
245 certain cases, this reached significant levels of up to ~50% of total reporter expression,  
246 compared to cells with orthogonal ribosomes present (**Supplementary Fig. 3b**, mCherry  
247 reporter). It has been shown that the first internal methionine codon in the standard mCherry  
248 sequence serves as a site of internal translation initiation and that replacing the AUG for a  
249 CUG (leucine) codon reduces the internal initiation frequency to less than 10% of that in the  
250 standard mCherry (Fages-Lartaud et al. 2022). We reasoned that an mCherry\_M10L construct

251 would be useful to assess whether our data with the standard mCherry was the result of the  
252 binding of native ribosomes to (i) our orthogonal SD upstream of the canonical AUG codon,  
253 or (ii) the internal AUG that happens to be preceded by an AG-rich sequence  
254 (GAGGAAGATAAC) coding for the previous four codons (EEDN). In the case of (i) we would  
255 expect the M10L construct not to affect the mCherry expression patterns, while in the case of  
256 (ii), we would expect a reduction of mCherry expression for all conditions. Experiments with  
257 the new construct (**Supplementary Fig. 3b**, mCherry\_M10L reporter) supported the existence  
258 of an internal SD upstream of M10. Removal of this initiation site increased our signal to noise  
259 ratio for mCherry detection by 3.2-fold.

260

## 261 **Discussion**

262 In this work, we have shown that TO-ribosomes are functionally robust to many different  
263 insertions into their TO-rRNA. We demonstrate that selection of permissible sites using either  
264 structural or sequence information typically leads to <20% decrease in translation activity. Our  
265 top performing site, C888, is located at the apex loop of 23S helix H38, also known as the A-  
266 site finger, and forms part of B1a, one of the twelve ribosomal inter-subunit bridges. This  
267 structure is reported to be involved in ribosome assembly (Yassin & Mankin 2007), subunit  
268 association (Liiv & O'Connor 2006; Sergiev et al. 2005) and reading frame maintenance  
269 (Komoda et al. 2006). Although H38 truncation appears to have modest phenotypic effects  
270 on translational activity (Komoda et al. 2006; Liiv & O'Connor 2006; Sergiev et al. 2005), it has  
271 been observed to impair ribosome assembly (Yassin & Mankin 2007), and curiously, has also  
272 been observed to increase translocation rates of mutant ribosomes *in vitro* (Komoda et al.  
273 2006; Kudrin et al. 2018; Wang et al. 2011). We find that extensions of this loop lead to notable  
274 increases in translation activity that are strain dependent (~50% in BL21(DE3) and ~6% in  
275 DH10B). As far as we are aware, the phenotypic effects of H38 extensions have not previously  
276 been investigated and could result from either an effect on translocation rate or ribosome  
277 assembly.

278 By using a Broccoli aptamer as a common insert in our library, we are also able to  
279 show that TO-ribosome concentrations can be monitored via fluorescence in both plate  
280 readers and by flow cytometry. Broccoli insertion into ribosomal targets has been previously  
281 reported, with the first document approach targeting the 5S rRNA (Filonov et al. 2014) and  
282 another exploring the robustness of the ribosome to different types of aptamers at a single  
283 location (Okuda et al. 2017). Our results are the most comprehensive to date, elucidating  
284 many new sites for future TO-ribosome engineering that appear to have little impact on  
285 translation activity and which are scattered across both major subunits.



286 An unexpected outcome of this work was the impact that different strains and media  
287 had on TO-ribosome concentrations and dynamics during batch cultures grown to stationary  
288 phase. Cells grown in glucose showed lower accumulation of TO-ribosomes than those grown  
289 in fructose. There is a large body of literature that connects native ribosome abundance with  
290 growth rate and growth conditions (Dai et al. 2016; Kim et al. 2020; Scott et al. 2010; Weiße  
291 et al. 2015). It has been proposed that during high growth rates, native ribosomes spend  
292 proportionally more time producing more ribosomes (ribosomal proteins) than other proteins,  
293 and this ratio decreases with decreasing growth rate (Scott et al. 2010). Initially, our fructose  
294 data seems to support this, as levels decrease with increasing growth rates. However, we are  
295 quantifying rRNA production, not protein production, and increased ribosomal protein  
296 production might be expected to result in higher levels of orthogonal ribosomes too. An  
297 alternative hypothesis might be that orthogonal ribosome abundance is dependent on its  
298 substrate concentration: ribosome abundance has been linked to ribosome demand, as  
299 inactive ribosomes are more prone to degradation (Zundel et al. 2009). As our reporter  
300 expression is driven by the *araBAD* promoter, it is inhibited by the presence of glucose via  
301 catabolite repression (Lichenstein et al. 1987), leading to low mRNA levels in the presence of  
302 glucose, that is supported by the low levels of mCherry measured from cultures grown in  
303 glucose (data not shown). Further work will be required to disentangle these effects.

304 Broccoli and related RNA aptamers have been used successfully over the last decade  
305 to monitor RNA localisation in living cells. However, their use in molecule quantification has  
306 lagged. We suspect this is largely due to the fact that most interest in this area concerns mRNA  
307 quantification, which suffers the dual challenge of low mRNA copies per transcript per cell  
308 (<10 in bacteria, (Bremer & Dennis 2008; So et al. 2011; Xie et al. 2008)), and poor folding  
309 efficiency of the Broccoli aptamer in the relatively unstructured context of mRNAs (Filonov et  
310 al. 2015). In contrast, ribosomal RNA is maintained at far higher copies per cell (in the order  
311 of  $10^4$ ) and forms an inherently structured scaffold to enable Broccoli folding, making it a more  
312 plausible target for accurate quantitative monitoring.

313 During this work, we identified a strain-dependent drop in DFHBI-1T levels over time  
314 (**Fig. 5b**), which makes continuous monitoring over extended time periods a challenge. It is  
315 clear from our data that a drop in DFHBI-1T is found for both strains we tested but is more  
316 pronounced for the BL21(DE3) cells. As far as we are aware, this is the first time such an  
317 effect has been described in the literature. It is currently not clear why a larger drop occurs for  
318 BL21(DE3). However, it may be due to the strains higher growth rate compared to the DH10B  
319 cells we also tested, and the ability for the cells to grow to higher final concentrations. While  
320 this constitutes a challenge to quantification, it is of interest that DFHBI-1T levels may be  
321 effectively tracked in live cultures. This allows us to make informed decisions about which

322 timepoints can be reliably compared and opens the possibility of correcting fluorescence  
323 readout for DFHBI-1T concentration at any given time.

324 As synthetic biology transitions from tinkering with biology to engineering it, the  
325 development of quantitative approaches for the real-time monitoring of core cellular  
326 components and machinery, like ribosomes, will be key to supporting informed optimisation of  
327 complex biomolecular systems in living cells (Shao et al. 2021). This work provides a step in  
328 this direction, offering new avenues to understand and tune protein synthesis, and further  
329 explore how orthogonal cellular machinery can be best used to create robust and predictable  
330 biotechnologies.

331

## 332 **Materials and Methods**

### 333 ***Strains and media***

334 For all plasmid cloning and propagation, *Escherichia coli* strain DH10B ( $\Delta(\text{ara-leu})$  7697  
335  $\text{araD139 fhuA } \Delta\text{lacX74 galK16 galE15 e14- phi80dlacZ}\Delta\text{M15 recA1 relA1 endA1 nupG rpsL}$   
336 (StrR)  $\text{rph spoT1 } \Delta(\text{mrr-hsdRMS-mcrBC})$  (New England Biolabs, C3019I) was used. For the  
337 characterisation of ribosomal variants, *E. coli* strains DH10B or BL21(DE3) ( $\text{fhuA2 [lon] ompT}$   
338  $\text{gal (lambda DE3) [dcm] } \Delta\text{hsdSlambda DE3 = lambda sBamHI } \Delta\text{EcoRI-B}$   
339  $\text{int::(lacI::PlacUV5::T7 gene1) i21 } \Delta\text{nin5}$ ) (New England Biolabs, C2527I) were used. The  
340 expression of pTac induced ribosomes was carried out in DH10B-Marionette strains (Meyer  
341 et al. 2019), a gift from Christopher Voigt (Marionette-Clo, Addgene #108251).

342 All cells were grown in either LB media (Sigma–Aldrich, L3522) for outgrowth and  
343 propagation, or M9 minimal media supplemented with fructose or glucose (6.78 g/L  $\text{Na}_2\text{HPO}_4$ ,  
344 3 g/L  $\text{KH}_2\text{PO}_4$ , 1 g/L  $\text{NH}_4\text{Cl}$ , 0.5 g/L  $\text{NaCl}$  (Sigma–Aldrich, M6030), 0.34 g/L thiamine  
345 hydrochloride (Sigma T4625), 0.8% D-glucose (Sigma–Aldrich, G7528) or 0.8% fructose  
346 (F3510), 0.2% casamino acids (Acros, AC61204-5000), 2 mM  $\text{MgSO}_4$  (Acros, 213115000),  
347 and 0.1mM  $\text{CaCl}_2$  (Sigma–Aldrich, C8106)) for characterisation experiments. Inducers used  
348 included L-(+)-arabinose (Sigma-Aldrich, A3256) or isopropyl beta-D1-thiogalactopyranoside  
349 (IPTG) (Sigma–Aldrich, I6758). For antibiotic selection, 100  $\mu\text{g/mL}$  ampicillin (Sigma–Aldrich,  
350 A9518), 50  $\mu\text{g/mL}$  kanamycin (Sigma–Aldrich, K1637) or 10  $\mu\text{g/mL}$  gentamicin (Sigma–  
351 Aldrich, G3632) were used.

352

### 353 ***Creation of an orthogonal ribosome insertion library***

354 All cloning steps were performed according to the manufacturers protocol unless specified  
355 otherwise. The 71 bp long insertion sequence containing the Broccoli aptamer, flanked by  
356 BsmBI restriction sites, was generated by annealing two reverse-complementary primers (all  
357 primers were synthesized by Integrated DNA Technology). Equimolar amounts were mixed,

358 heated to 95°C and the temperature was decreased to 50°C (30 s per 1°C). This insertion  
359 sequence and the poRibo-T2 plasmid (a gift from Michael Jewett; Addgene plasmid #69347;  
360 (Orelle et al. 2015)) were used as PCR templates. PCR was performed using Q5 High-Fidelity  
361 DNA Polymerase (New England Biolabs, M0491S) and primers harbouring overhangs for  
362 Gibson Assembly. After gel extraction using the Monarch DNA Gel Extraction Kit (New  
363 England Biolabs, T1020S) Gibson Assembly (New England Biolabs, E2611S) of the two parts  
364 was performed, and 2 µL were used for transformation. After overnight growth at 37°C,  
365 individual colonies were picked and a colony PCR using Quick-Load Taq 2X Master Mix (New  
366 England Biolabs, M0271L) was used to confirm the expected insert size. Positive colonies  
367 were incubated overnight at 37°C and plasmids were isolated using the Monarch Plasmid  
368 Miniprep Kit (New England Biolabs, T1010L). For all assembled plasmids the sequence was  
369 confirmed by Sanger sequencing. Insertion of other sequences were performed in a similar  
370 way. Plasmid sequences are provided in **Supplementary Data 1**.

371

### 372 ***Assembly of reporter plasmids***

373 Most reporter plasmids were derived from the SEVA based mCherry reporter plasmids first  
374 reported in (Csibra & Stan 2022). The parental vector (pS361\_ara\_mCherry) is a medium copy  
375 p15A vector (pSEVA361) containing a native SD (AGGAGG) followed by an N-terminally His-  
376 tagged, codon-optimised mCherry coding sequence (FPbase ID: ZERB6, (Lambert 2019)).  
377 The SD of this reporter was swapped to an orthogonal SD (ACCACA) that matches the antiSD  
378 within poRiboT2, by reverse PCR and blunt end ligation with KLD (NEB M0554S).  
379 Subsequently, an internal initiation site within the mCherry coding sequence was removed by  
380 changing the Met10 codon (AUG) to a leucine codon (CUG) to create the M10L variant, using  
381 the same protocol. The mGFPmut3 oSD reporter was assembled from the parental vector  
382 (pS361\_ara\_mGFPmut3) similarly, by swapping the native SD for an oSD. For the BL21(DE3)  
383 screen, mCherry reporters with an oSD and under the control of a T7 promoter were  
384 assembled in a pSEVA661 (p15A, gentamicin resistance) backbone. All plasmid sequences  
385 were verified by Sanger sequencing.

386

### 387 ***Monitoring cell growth and fluorescence using plate reader assays***

388 Single colonies were used to inoculate 1 mL M9 media containing antibiotics and incubated in  
389 deep well plates at 30°C and 700 rpm for 16 h in a shaking incubator. Starter cultures were  
390 created by diluting overnight cultures to an OD600 of 0.05/ml in 1 mL fresh M9 media with  
391 antibiotics and incubated at 30°C and 700 rpm for an hour in the same shaking incubator,  
392 before transfer to a 96-well black polystyrene clear-bottom plate (Corning Inc.) for plate reader  
393 assays. Inducers such as arabinose (to 0.1%) and labels such as DFHBI-1T (to 200 µM, Bio-

394 Techne Ltd, 5610) were added to these plates, with the cultures added to achieve final  
395 volumes of 200  $\mu$ L/well.

396 Plate reader measurements were taken using a multiwell plate reader at 30°C for 16  
397 h with double orbital shaking. The plate readers used for the experiments in this manuscript  
398 include a SpectraMax iD5 (Molecular Devices, LLC.), a Synergy Neo2 (Biotek) and a Tecan  
399 Spark multimode plate reader (Tecan). Cell density measurements were monitored using  
400 OD600 and OD700 measurements. Protein and RNA fluorescence was monitored using green  
401 (ex 485/20 nm, em 535/25 nm) and red (ex 560/20 nm, em 610/20 nm) filter sets, with minor  
402 variations depending on the instrument used. Plate reader measurements were calibrated for  
403 red fluorescence using mCherry lysates, and OD with microspheres, as previously described  
404 (Csibra & Stan 2022).

405

#### 406 ***Monitoring fluorescence by flow cytometry***

407 Samples (2–5  $\mu$ l) were removed from cultures growing in a plate reader at log phase (3 h post  
408 transfer to multiwell plates) or stationary phase (20 h) and diluted in 1 ml M9 with vigorous  
409 vortexing. Aliquots from this dilution were transferred to 96-well round-bottom plates  
410 containing 4  $\mu$ l 10mM DFHBI-1T (Bio-Techne) for a final concentration of 200  $\mu$ M.  
411 Fluorescence was analysed on an Attune NxT flow cytometer in the BL1 (ex 488, em 535/25  
412 nm) and YL2 (ex 560, em 620/20 nm) channels.

413

#### 414 ***Quantification of DFHBI-1T over time in plate reader assays***

415 DFHBI-1T is a small molecule fluorophore whose quantum yield is approximately 100-fold  
416 lower in solution than in its Broccoli-bound form (Filonov et al. 2014). However, its light  
417 absorbance is efficient even alone in solution, and its absorbance spectrum has been  
418 previously recorded as having a peak at 426 nm and an extinction coefficient of 35,400 M<sup>-1</sup>  
419 cm<sup>-1</sup> (**Supplementary Fig. 2a**, data from (Filonov et al. 2014)). In the development of the  
420 FPCountR method for fluorescent protein quantification with plate readers (Csibra & Stan  
421 2022), a method for the accurate quantification of fluorescent proteins was developed based  
422 on light absorbance at the proteins' absorbance maxima. It was established that protein  
423 abundance may be reliably monitored even in crude bacterial lysates, as long as the  
424 absorbance peaks could be resolved. Using a similar strategy, it is possible to track DFHBI-  
425 1T by monitoring OD426 over time. In the case of DFHBI-1T, this is possible in the cultures  
426 themselves, as the peaks are resolvable even in intact cultures (data not shown). To quantify  
427 DFHBI-1T in cultures, OD426 measurements were normalised to those of the M9 media.  
428 Following this, the OD426 contribution of the bacterial cells were calculated using the OD700  
429 measurements of cell number and conversions calculated from the absorbance spectra of  
430 cells (Csibra & Stan 2022). Subtracting the cellular OD426 contribution from the normalised

431 OD426 allowed us to estimate the DFHBI-1T absorbance at 426 nm. This was converted to  
432 DFHBI-1T concentration via its extinction coefficient. The accuracy of this method is supported  
433 by the fact that starting concentrations of DFHBI-1T in all cultures were typically calculated  
434 within 10% of their intended concentrations (**Supplementary Fig. 2b**; which may have been  
435 due to imprecision in the exact mass of DFHBI-1T delivered or in pipetting, rather than in  
436 calculation).

437

### 438 ***Ribosome structure visualisation***

439 Molecular graphics and analysis was performed using ChimeraX (Meng et al. 2023). For all  
440 figures shown the PDB model 8B0X was used (Fromm et al. 2023). Molecular structures were  
441 displayed in cartoon backbone representation with ribosomal proteins coloured beige and  
442 rRNA coloured grey. Individual atoms, in between which Broccoli was inserted, were displayed  
443 as spheres and colour-coded. In case insertion sites were not modelled in the structure, the  
444 two closest residues were displayed instead.

445

### 446 ***Data analysis***

447 Data analysis was performed using R version 4.0.3 with general data handling packages of  
448 the tidyverse (Wickham et al. 2019). Plate reader data analysis was carried out using Parsley  
449 and FPCountR (Csibra 2021, 2023; Csibra & Stan 2022, 2023). Flow cytometry data analysis  
450 utilised FlopR (Fedorec 2023; Fedorec et al. 2020). Sequence alignment analysis made use  
451 of the SILVA rRNA database (Quast et al. 2013) and the DECIPHER package (Wright 2016).

452

### 453 **Data Availability**

454 All plasmid sequences are provided as **Supplementary Data 1**.

455

### 456 **Acknowledgements**

457 B.K. was supported by an ERASMUS+ grant. G.H.S. was supported by an EPSRC PhD  
458 Studentship. T.E.G. was supported by a Royal Society University Research Fellowship grants  
459 UF160357 and URF/R/221008, UKRI grant BB/W012448/1, a Turing Fellowship from The Alan  
460 Turing Institute under EPSRC grant EP/N510129/1. E.C. was supported by a Seeds for  
461 Success grant from the Imperial College Postdoc and Fellows Development Centre (2022)  
462 and an Eric Reid Fund for Methodology from the Biochemical Society (2023).

463

### 464 **Author Contributions**

465 E.C. and T.E.G. conceived the project, provided guidance on experimental design and data  
466 analysis, supervised the work and should be considered joint senior authors. B.K., G.H.S. and  
467 E.C. performed experiments. E.C, G.H.S and B.K carried out data analysis. E.C. drafted the  
468 initial manuscript with input from all authors, and all authors contributed to the final manuscript.

469

470 **Conflict of interest statement**

471 None declared.

## 472 References

- 473 Ahn-Horst, T. A., Mille, L. S., Sun, G., Morrison, J. H., & Covert, M. W. (2022). 'An expanded  
474 whole-cell model of E. coli links cellular physiology with mechanisms of growth rate  
475 control', *npj Systems Biology and Applications*, 8/1: 1–21. Nature Publishing Group.  
476 DOI: 10.1038/s41540-022-00242-9
- 477 Aleksashin, N. A., Leppik, M., Hockenberry, A. J., Klepacki, D., Vázquez-Laslop, N., Jewett,  
478 M. C., Remme, J., et al. (2019). 'Assembly and functionality of the ribosome with  
479 tethered subunits', *Nature Communications*, 10/1: 930. Nature Publishing Group.  
480 DOI: 10.1038/s41467-019-08892-w
- 481 Ali, I. K., Lancaster, L., Feinberg, J., Joseph, S., & Noller, H. F. (2006). 'Deletion of a  
482 Conserved, Central Ribosomal Intersubunit RNA Bridge', *Molecular Cell*, 23/6: 865–  
483 74. DOI: 10.1016/j.molcel.2006.08.011
- 484 Bienko, M., Crosetto, N., Teytelman, L., Klemm, S., Itzkovitz, S., & van Oudenaarden, A.  
485 (2013). 'A versatile genome-scale PCR-based pipeline for high-definition DNA FISH',  
486 *Nature Methods*, 10/2: 122–4. Nature Publishing Group. DOI: 10.1038/nmeth.2306
- 487 Bremer, H., & Dennis, P. P. (2008). 'Modulation of Chemical Composition and Other  
488 Parameters of the Cell at Different Exponential Growth Rates', *EcoSal Plus*, 3/1:  
489 10.1128/ecosal.5.2.3. American Society for Microbiology. DOI: 10.1128/ecosal.5.2.3
- 490 Cai, L., Friedman, N., & Xie, X. S. (2006). 'Stochastic protein expression in individual cells at  
491 the single molecule level', *Nature*, 440/7082: 358–62. Nature Publishing Group. DOI:  
492 10.1038/nature04599
- 493 Carlson, E. D., d'Aquino, A. E., Kim, D. S., Fulk, E. M., Hoang, K., Szal, T., Mankin, A. S., et  
494 al. (2019). 'Engineered ribosomes with tethered subunits for expanding biological  
495 function', *Nature Communications*, 10/1: 3920. DOI: 10.1038/s41467-019-11427-y
- 496 Chen, X., Zhang, D., Su, N., Bao, B., Xie, X., Zuo, F., Yang, L., et al. (2019). 'Visualizing  
497 RNA dynamics in live cells with bright and stable fluorescent RNAs', *Nature*  
498 *Biotechnology*, 37/11: 1287–93. DOI: 10.1038/s41587-019-0249-1
- 499 Csibra, E. (2021). 'FPCountR: Fluorescent protein calibration for plate readers'. Zenodo.  
500 DOI: 10.5281/zenodo.5760028
- 501 Csibra, E. (2023). 'parsleyapp package v1.0.0'. R, GitHub. DOI: 10.5281/zenodo.10011752
- 502 Csibra, E., & Stan, G.-B. (2022). 'Absolute protein quantification using fluorescence  
503 measurements with FPCountR', *Nature Communications*, 13/1: 6600. DOI:  
504 10.1038/s41467-022-34232-6
- 505 Csibra, E., & Stan, G.-B. (2023). 'Parsley: a web app for parsing data from plate readers'.  
506 DOI: 10.5281/zenodo.8072500
- 507 Dai, X., Zhu, M., Warren, M., Balakrishnan, R., Patsalo, V., Okano, H., Williamson, J. R., et  
508 al. (2016). 'Reduction of translating ribosomes enables Escherichia coli to maintain  
509 elongation rates during slow growth', *Nature Microbiology*, 2/2: 1–9. DOI:  
510 10.1038/nmicrobiol.2016.231
- 511 Darlington, A. P. S., Kim, J., Jiménez, J. I., & Bates, D. G. (2018). 'Dynamic allocation of  
512 orthogonal ribosomes facilitates uncoupling of co-expressed genes', *Nature*  
513 *Communications*, 9/1: 695. DOI: 10.1038/s41467-018-02898-6
- 514 Espah Borujeni, A., Zhang, J., Doosthosseini, H., Nielsen, A. A. K., & Voigt, C. A. (2020).  
515 'Genetic circuit characterization by inferring RNA polymerase movement and  
516 ribosome usage', *Nature Communications*, 11/1: 5001. Nature Publishing Group.  
517 DOI: 10.1038/s41467-020-18630-2
- 518 Fages-Lartaud, M., Tietze, L., Elie, F., Lale, R., & Hohmann-Marriott, M. F. (2022). 'mCherry  
519 contains a fluorescent protein isoform that interferes with its reporter function',  
520 *Frontiers in Bioengineering and Biotechnology*, 10.
- 521 Farasat, I., Kushwaha, M., Collens, J., Easterbrook, M., Guido, M., & Salis, H. M. (2014).  
522 'Efficient search, mapping, and optimization of multi-protein genetic systems in  
523 diverse bacteria', *Molecular Systems Biology*, 10/6: 731. John Wiley & Sons, Ltd.  
524 DOI: 10.15252/msb.20134955
- 525 Fedorec, A. J. H. (2023). 'FlopR'. R, GitHub. URL: <https://github.com/ucl-cssb/flopR>

- 526 Fedorec, A. J. H., Robinson, C. M., Wen, K. Y., & Barnes, C. P. (2020). 'FlopR: An Open  
527 Source Software Package for Calibration and Normalization of Plate Reader and  
528 Flow Cytometry Data', *ACS Synthetic Biology*, 9/9: 2258–66. DOI:  
529 10.1021/acssynbio.0c00296
- 530 Filonov, G. S., Kam, C. W., Song, W., & Jaffrey, S. R. (2015). 'In-gel imaging of RNA  
531 processing using Broccoli reveals optimal aptamer expression strategies', *Chemistry  
532 & biology*, 22/5: 649–60. DOI: 10.1016/j.chembiol.2015.04.018
- 533 Filonov, G. S., Moon, J. D., Svensen, N., & Jaffrey, S. R. (2014). 'Broccoli: Rapid Selection  
534 of an RNA Mimic of Green Fluorescent Protein by Fluorescence-Based Selection and  
535 Directed Evolution', *Journal of the American Chemical Society*, 136/46: 16299–308.  
536 DOI: 10.1021/ja508478x
- 537 Fried, S. D., Schmied, W. H., Uttamapinant, C., & Chin, J. W. (2015). 'Ribosome Subunit  
538 Stapling for Orthogonal Translation in E.coli', 54: 12791–4.
- 539 Fromm, S. A., O'Connor, K. M., Purdy, M., Bhatt, P. R., Loughran, G., Atkins, J. F., Jomaa,  
540 A., et al. (2023). 'The translating bacterial ribosome at 1.55 Å resolution generated by  
541 cryo-EM imaging services', *Nature Communications*, 14/1: 1095. Nature Publishing  
542 Group. DOI: 10.1038/s41467-023-36742-3
- 543 Gorochofski, T. E., Chelysheva, I., Eriksen, M., Nair, P., Pedersen, S., & Ignatova, Z.  
544 (2019). 'Absolute quantification of translational regulation and burden using  
545 combined sequencing approaches', *Molecular Systems Biology*, 15/5: e8719. DOI:  
546 10.15252/msb.20188719
- 547 Gorochofski, T. E., Espah Borujeni, A., Park, Y., Nielsen, A. A., Zhang, J., Der, B. S.,  
548 Gordon, D. B., et al. (2017). 'Genetic circuit characterization and debugging using  
549 RNA-seq', *Molecular Systems Biology*, 13/11: 952. DOI: 10.15252/msb.20167461
- 550 Green, A. A., Silver, P. A., Collins, J. J., & Yin, P. (2014). 'Toehold Switches: De-Novo-  
551 Designed Regulators of Gene Expression', *Cell*, 159/4: 925–39. Elsevier. DOI:  
552 10.1016/j.cell.2014.10.002
- 553 Kim, J., Darlington, A., Salvador, M., Utrilla, J., & Jiménez, J. I. (2020). 'Trade-offs between  
554 gene expression, growth and phenotypic diversity in microbial populations', *Current  
555 Opinion in Biotechnology*, 62: 29–37. DOI: 10.1016/j.copbio.2019.08.004
- 556 Kolber, N. S., Fattal, R., Bratulic, S., Carver, G. D., & Badran, A. H. (2021). 'Orthogonal  
557 translation enables heterologous ribosome engineering in E. coli', *Nature  
558 Communications*, 12/1: 599. Nature Publishing Group. DOI: 10.1038/s41467-020-  
559 20759-z
- 560 Komoda, T., Sato, N. S., Phelps, S. S., Namba, N., Joseph, S., & Suzuki, T. (2006). 'The A-  
561 site finger in 23 S rRNA acts as a functional attenuator for translocation', *The Journal  
562 of Biological Chemistry*, 281/43: 32303–9. DOI: 10.1074/jbc.M607058200
- 563 Kudrin, P., Dzhygyr, I., Ishiguro, K., Beljantseva, J., Maksimova, E., Oliveira, S. R. A., Varik,  
564 V., et al. (2018). 'The ribosomal A-site finger is crucial for binding and activation of  
565 the stringent factor RelA', *Nucleic Acids Research*, 46/4: 1973–83. DOI:  
566 10.1093/nar/gky023
- 567 Lambert, T. J. (2019). 'FPbase: a community-editable fluorescent protein database', *Nature  
568 Methods*, 16/4: 277–8. DOI: 10.1038/s41592-019-0352-8
- 569 Lichenstein, H. S., Hamilton, E. P., & Lee, N. (1987). 'Repression and catabolite gene  
570 activation in the araBAD operon.', *Journal of Bacteriology*, 169/2: 811–22.
- 571 Liiv, A., & O'Connor, M. (2006). 'Mutations in the intersubunit bridge regions of 23 S rRNA',  
572 *The Journal of biological chemistry*, 281/40: 29850–62. DOI:  
573 10.1074/jbc.m603013200
- 574 Liu, C. C., Jewett, M. C., Chin, J. W., & Voigt, C. A. (2018). 'Toward an orthogonal central  
575 dogma', *Nature Chemical Biology*, 14/2: 103–6. Nature Publishing Group. DOI:  
576 10.1038/nchembio.2554
- 577 Matadeen, R., Sergiev, P., Leonov, A., Pape, T., Van Der Sluis, E., Mueller, F., Osswald, M.,  
578 et al. (2001). 'Direct localization by cryo-electron microscopy of secondary structural  
579 elements in Escherichia coli 23 S rRNA which differ from the corresponding regions



- 580 in Haloarcula marismortui', *Journal of Molecular Biology*, 307/5: 1341–9. DOI:  
581 10.1006/jmbi.2001.4547
- 582 Meng, E. C., Goddard, T. D., Pettersen, E. F., Couch, G. S., Pearson, Z. J., Morris, J. H., &  
583 Ferrin, T. E. (2023). 'UCSF ChimeraX: Tools for structure building and analysis',  
584 *Protein Science*, 32/11: e4792. DOI: 10.1002/pro.4792
- 585 Meyer, A. J., Segall-Shapiro, T. H., Glassey, E., Zhang, J., & Voigt, C. A. (2019). 'Escherichia  
586 coli "Marionette" strains with 12 highly optimized small-molecule sensors', *Nature*  
587 *Chemical Biology*, 15/2: 196–204. DOI: 10.1038/s41589-018-0168-3
- 588 Muldoon, J. J., Kandula, V., Hong, M., Donahue, P. S., Boucher, J. D., Bagheri, N., &  
589 Leonard, J. N. (2021). 'Model-guided design of mammalian genetic programs',  
590 *Science Advances*, 7/8: eabe9375. American Association for the Advancement of  
591 Science. DOI: 10.1126/sciadv.abe9375
- 592 Mutalik, V. K., Guimaraes, J. C., Cambray, G., Lam, C., Christoffersen, M. J., Mai, Q.-A.,  
593 Tran, A. B., et al. (2013). 'Precise and reliable gene expression via standard  
594 transcription and translation initiation elements', *Nature Methods*, 10/4: 354–60. DOI:  
595 10.1038/nmeth.2404
- 596 Nielsen, A. A. K., Der, B. S., Shin, J., Vaidyanathan, P., Paralanov, V., Strychalski, E. A.,  
597 Ross, D., et al. (2016). 'Genetic circuit design automation', *Science*, 352/6281:  
598 aac7341. American Association for the Advancement of Science. DOI:  
599 10.1126/science.aac7341
- 600 Okuda, M., Fourmy, D., & Yoshizawa, S. (2017). 'Use of Baby Spinach and Broccoli for  
601 imaging of structured cellular RNAs', *Nucleic Acids Research*, 45/3: 1404–15. DOI:  
602 10.1093/nar/gkw794
- 603 Orelle, C., Carlson, E. D., Szal, T., Florin, T., Jewett, M. C., & Mankin, A. S. (2015). 'Protein  
604 synthesis by ribosomes with tethered subunits', *Nature*, 524/7563: 119–24. DOI:  
605 10.1038/nature14862
- 606 Quast, C., Pruesse, E., Yilmaz, P., Gerken, J., Schweer, T., Yarza, P., Peplies, J., et al.  
607 (2013). 'The SILVA ribosomal RNA gene database project: improved data processing  
608 and web-based tools', *Nucleic Acids Research*, 41/Database issue: D590–6. DOI:  
609 10.1093/nar/gks1219
- 610 Rackham, O., & Chin, J. W. (2005). 'A network of orthogonal ribosome-mRNA pairs', *Nature*  
611 *Chemical Biology*, 1/3: 159–66. DOI: 10.1038/nchembio719
- 612 Raj, A., van den Bogaard, P., Rifkin, S. A., van Oudenaarden, A., & Tyagi, S. (2008).  
613 'Imaging individual mRNA molecules using multiple singly labeled probes', *Nature*  
614 *Methods*, 5/10: 877–9. Nature Publishing Group. DOI: 10.1038/nmeth.1253
- 615 Raj, A., & van Oudenaarden, A. (2009). 'Single-Molecule Approaches to Stochastic Gene  
616 Expression', *Annual Review of Biophysics*, 38/1: 255–70. DOI:  
617 10.1146/annurev.biophys.37.032807.125928
- 618 Salis, H. M., Mirsky, E. A., & Voigt, C. A. (2009). 'Automated design of synthetic ribosome  
619 binding sites to control protein expression', *Nature Biotechnology*, 27/10: 946–50.  
620 Nature Publishing Group. DOI: 10.1038/nbt.1568
- 621 Schmied, W. H., Tnimov, Z., Uttamapinant, C., Rae, C. D., Fried, S. D., & Chin, J. W. (2018).  
622 'Controlling orthogonal ribosome subunit interactions enables evolution of new  
623 function', *Nature*, 564/7736: 444–8. DOI: 10.1038/s41586-018-0773-z
- 624 Schreiber, J., Arter, M., Lapique, N., Haefliger, B., & Benenson, Y. (2016). 'Model-guided  
625 combinatorial optimization of complex synthetic gene networks', *Molecular Systems*  
626 *Biology*, 12/12: 899. John Wiley & Sons, Ltd. DOI: 10.15252/msb.20167265
- 627 Scott, M., Gunderson, C. W., Mateescu, E. M., Zhang, Z., & Hwa, T. (2010).  
628 'Interdependence of Cell Growth and Gene Expression: Origins and Consequences',  
629 *Science*, 330/6007: 1099–102. DOI: 10.1126/science.1192588
- 630 Sergiev, P. V., Kiparisov, S. V., Burakovsky, D. E., Lesnyak, D. V., Leonov, A. A., Bogdanov,  
631 A. A., & Dontsova, O. A. (2005). 'The Conserved A-site Finger of the 23S rRNA: Just  
632 One of the Intersubunit Bridges or a Part of the Allosteric Communication Pathway?',  
633 *Journal of Molecular Biology*, 353/1: 116–23. DOI: 10.1016/j.jmb.2005.08.006

- 634 Shao, B., Rammohan, J., Anderson, D. A., Alperovich, N., Ross, D., & Voigt, C. A. (2021).  
635 'Single-cell measurement of plasmid copy number and promoter activity', *Nature*  
636 *Communications*, 12/1: 1475. DOI: 10.1038/s41467-021-21734-y
- 637 Shi, X., Khade, P. K., Sanbonmatsu, K. Y., & Joseph, S. (2012). 'Functional role of the  
638 sarcin-ricin loop of the 23S rRNA in the elongation cycle of protein synthesis', *Journal*  
639 *of Molecular Biology*, 419/3–4: 125–38. DOI: 10.1016/j.jmb.2012.03.016
- 640 So, L., Ghosh, A., Zong, C., Sepúlveda, L. A., Segev, R., & Golding, I. (2011). 'General  
641 properties of transcriptional time series in *Escherichia coli*', *Nature Genetics*, 43/6:  
642 554–60. Nature Publishing Group. DOI: 10.1038/ng.821
- 643 Wang, L., Altman, R. B., & Blanchard, S. C. (2011). 'Insights into the molecular determinants  
644 of EF-G catalyzed translocation', *RNA*, 17/12: 2189–200. DOI:  
645 10.1261/rna.029033.111
- 646 Weiße, A. Y., Oyarzún, D. A., Danos, V., & Swain, P. S. (2015). 'Mechanistic links between  
647 cellular trade-offs, gene expression, and growth', *Proceedings of the National*  
648 *Academy of Sciences*, 112/9: E1038–47. DOI: 10.1073/pnas.1416533112
- 649 Wickham, H., Averick, M., Bryan, J., Chang, W., McGowan, L., François, R., Grolemund, G.,  
650 et al. (2019). 'Welcome to the Tidyverse', *Journal of Open Source Software*, 4/43:  
651 1686. DOI: 10.21105/joss.01686
- 652 Witherell, G. W., Gott, J. M., & Uhlenbeck, O. C. (1991). 'Specific interaction between RNA  
653 phage coat proteins and RNA', *Progress in Nucleic Acid Research and Molecular*  
654 *Biology*, 40: 185–220. DOI: 10.1016/s0079-6603(08)60842-9
- 655 Wright, E., S. (2016). 'Using DECIPHER v2.0 to Analyze Big Biological Sequence Data in R',  
656 *The R Journal*, 8/1: 352. DOI: 10.32614/RJ-2016-025
- 657 Xie, X. S., Choi, P. J., Li, G.-W., Lee, N. K., & Lia, G. (2008). 'Single-molecule approach to  
658 molecular biology in living bacterial cells', *Annual Review of Biophysics*, 37: 417–44.  
659 DOI: 10.1146/annurev.biophys.37.092607.174640
- 660 Yassin, A., & Mankin, A. S. (2007). 'Potential New Antibiotic Sites in the Ribosome Revealed  
661 by Deleterious Mutations in RNA of the Large Ribosomal Subunit\*', *Journal of*  
662 *Biological Chemistry*, 282/33: 24329–42. DOI: 10.1074/jbc.M703106200
- 663 Yokoyama, T., & Suzuki, T. (2008). 'Ribosomal RNAs are tolerant toward genetic insertions:  
664 evolutionary origin of the expansion segments', *Nucleic Acids Research*, 36/11:  
665 3539–51. DOI: 10.1093/nar/gkn224
- 666 Youngman, E. M., Brunelle, J. L., Kochaniak, A. B., & Green, R. (2004). 'The Active Site of  
667 the Ribosome Is Composed of Two Layers of Conserved Nucleotides with Distinct  
668 Roles in Peptide Bond Formation and Peptide Release', *Cell*, 117/5: 589–99. DOI:  
669 10.1016/S0092-8674(04)00411-8
- 670 Youngman, E. M., & Green, R. (2005). 'Affinity purification of in vivo-assembled ribosomes  
671 for in vitro biochemical analysis', *Methods*, 36/3: 305–12. DOI:  
672 10.1016/j.ymeth.2005.04.007
- 673 Zhao, E. M., Mao, A. S., de Puig, H., Zhang, K., Tippens, N. D., Tan, X., Ran, F. A., et al.  
674 (2022). 'RNA-responsive elements for eukaryotic translational control', *Nature*  
675 *Biotechnology*, 40/4: 539–45. Nature Publishing Group. DOI: 10.1038/s41587-021-  
676 01068-2
- 677 Zundel, M. A., Basturea, G. N., & Deutscher, M. P. (2009). 'Initiation of ribosome degradation  
678 during starvation in *Escherichia coli*', *RNA (New York, N.Y.)*, 15/5: 977–83. DOI:  
679 10.1261/rna.1381309

681

682 **Figures and captions**

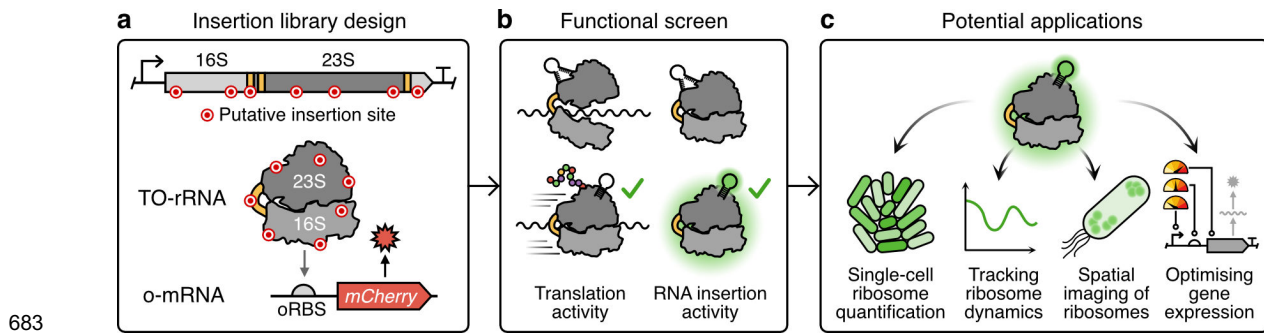

684 **Figure 1. Overview of ribosome functionalisation from candidate site identification to**  
685 **application.** (a) Identification of candidate sites in the tethered orthogonal (TO-) rRNA that  
686 may be permissive for RNA insertion was carried out by structural analysis or sequence  
687 analysis. (b) Experimental strategy for testing of permissive sites included assays of  
688 translation activity and function of inserted Broccoli aptamer. (c) The ability to create TO-  
689 ribosomes that fluoresce opens up numerous applications from monitoring to optimisation of  
690 cellular processes.

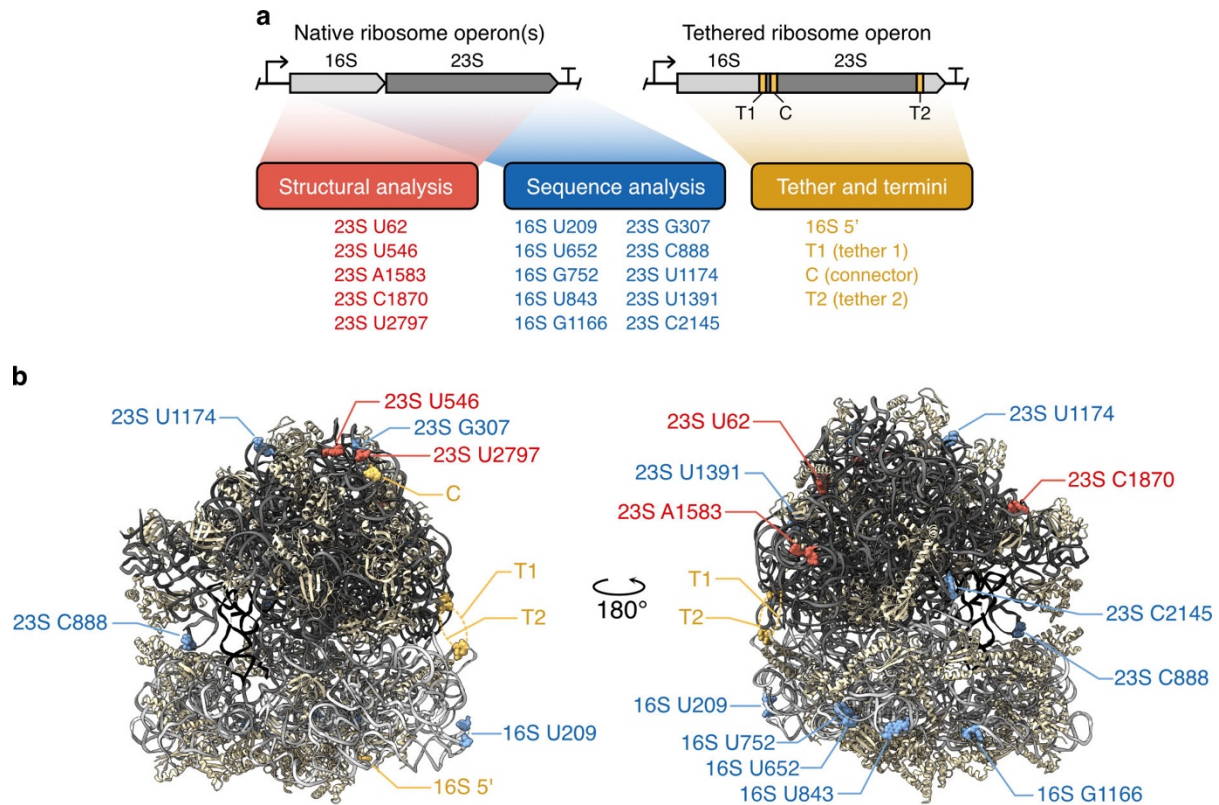

691

692 **Figure 2. Identification of candidate sites for insertion screening.** (a) Candidate site  
 693 identification. Candidate sites were identified by structural (red) and sequence analysis (blue)  
 694 of the native *E. coli* ribosomal operons. In addition, the 5' terminus of the TO-ribosome, and  
 695 all three linker regions (tethers 1 and 2, and the connector; mustard-coloured) were also  
 696 tested. Operon structures are coloured by ribosomal location: linker region, mustard; 23S  
 697 rRNA, dark grey; 16S rRNA, light grey. (b) Location of identified sites on the 70S tethered  
 698 ribosome structure (PDB: 8B0X). Tethers T1 and T2 are not modelling in this high-resolution  
 699 structure and so a dashed mustard-coloured lines denote the points they would attach to in  
 700 the 23S and 16S subunits. TO-, tethered orthogonal.

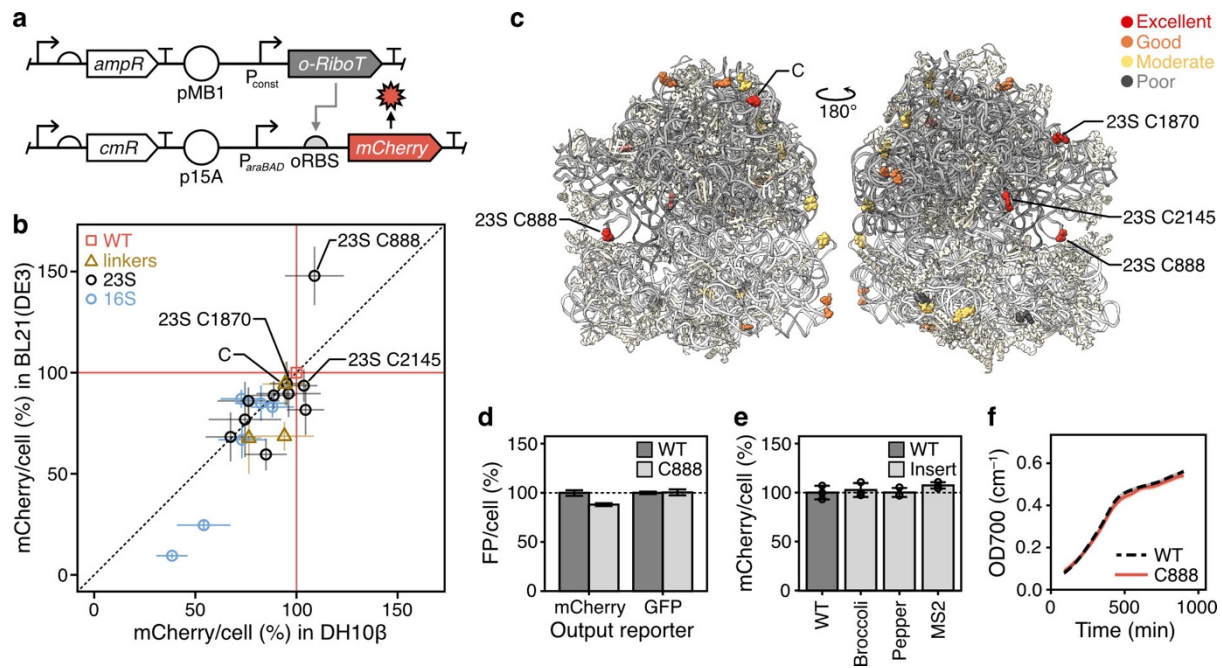

701

702 **Figure 3. Insertion screening of tethered orthogonal rRNA reveals permissive sites at**

703 **which ribosomes may be functionalised. (a)** Schematics of the genetic constructs used to

704 express the TO-ribosomes from the *o-RiboT* gene (top) and test their ability to express an oSD

705 RBS (oRBS) driven mCherry reporter (bottom). **(b)** Performance of mutant TO-ribosomes in

706 two *E. coli* strains. Cells were co-transformed with orthogonal ribosome and orthogonal

707 mCherry reporter plasmids, and grown in M9 media, while oSD-mCherry was induced with

708 0.1% arabinose. mCherry production per cell was calculated from mCherry and OD readings,

709 and results were compared to the readings from the 'WT' TO-ribosome variant at 720 min,

710 which was set to 100%. Plotted data represents the mean and standard deviation of results

711 over at least 2 independent repeats conducted in quadruplicate. Sites are coloured by

712 ribosomal location: no insert/WT, red; insert in linker region, yellow; insert in 23S rRNA region,

713 light blue; insert in 16S rRNA region, dark blue. **(c)** Structure of TO-ribosome, showing

714 insertion sites by performance (red to dark grey, best to worst; PDB: 8B0X). Variants were

715 classified as Excellent (>90% activity in BL21(DE3) and >85% activity in DH10B strains), Good

716 (>80% activity in both strains), Moderate (>60% in BL21(DE3) and >70% in DH10B) and Poor

717 (<60% in both). **(d)** Performance of WT and C888 insertion mutant when expressing mCherry

718 and GFP orthogonal reporters in DH10B strain. Cells were grown and induced, and data was

719 analysed, as in panel (b). **(e)** Permissiveness of C888 site for a range of insertions in DH10B

720 strain. Cells were grown and induced, and data was analysed, as in panel (a). **(f)** Growth curve

721 of WT and C888::Broccoli variants in DH10B strain over a standard assay. Representative of

722 multiple experiments. WT, poRiboT2; C888, poRiboT2\_C888::insertion. Insertions in panels

723 (b)–(d) and f are Broccoli. In panel (d), the identity of the insertion is given on the x-axis.

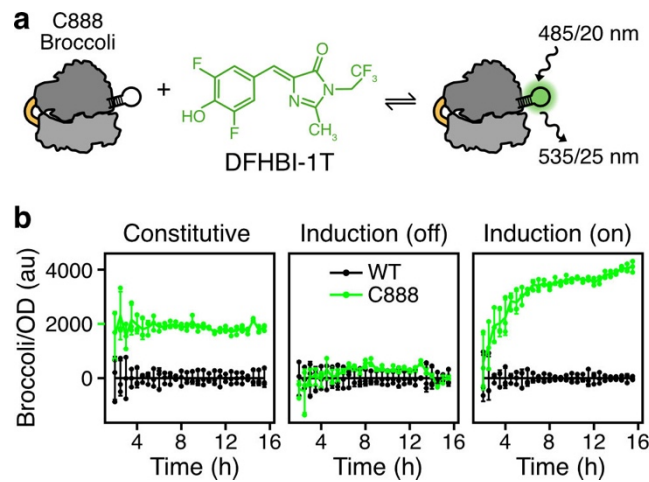

724

725 **Figure 4. O-Ribosomes can be detected in live cells with Broccoli.** (a) Diagram of Broccoli  
726 fluorescence with DFHBI-1T binding. (b) Broccoli fluorescence can be detected from cells  
727 expressing TO-ribosomes with C888::Broccoli insertion, from both a constitutive promoter  
728 (phage lambda pL promoter, without repressor) or an IPTG-induced  $P_{tac}$  promoter. Cells  
729 (DH10B, left panel; DH10B-Marionette, middle and right panel) were transformed with  
730 orthogonal ribosome variants (poRiboT2: left panel, or pTac\_oRiboT2, middle and right panel,  
731 with or without C888::Broccoli insertions), and grown in M9. Orthogonal ribosome expression  
732 was either not induced (left, middle panels) or induced with 1mM IPTG (right panel). Broccoli  
733 per cell was quantified by normalising green fluorescence per OD700 readings from Broccoli  
734 containing samples to matched controls. Plotted data represents the mean, standard  
735 deviation, and triplicate data points over time. WT, oRiboT2 construct without Broccoli  
736 insertion; C888, constructs containing C888::Broccoli.

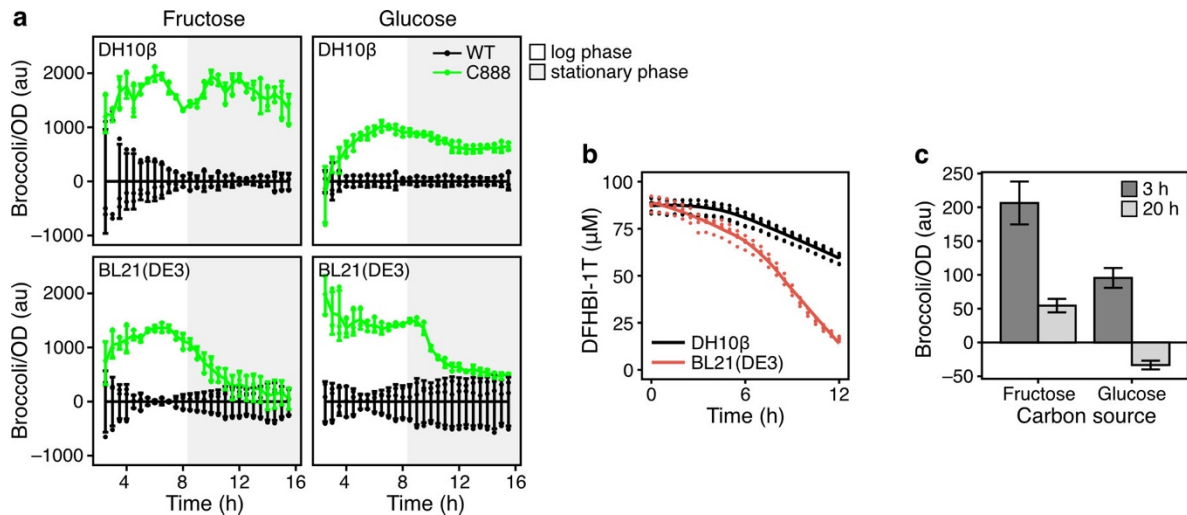

737

738

739

740

741

742

743

744

745

746

747

748

749

750

751

752

753

754

755

**Figure 5. Application of Broccoli insertion to orthogonal ribosome quantification in engineered cells.** (a) Time course tracking of Broccoli fluorescence under a range of growth conditions suggests TO-ribosome abundance may be affected by bacterial strain, sugar and growth phase. DH10 $\beta$  cells were transformed with orthogonal ribosome variants (poRiboT2 with or without C888::Broccoli insertion), and grown in M9 supplemented with 0.8% fructose or glucose as a carbon source. Broccoli per cell was quantified by normalising green fluorescence per OD700 readings from Broccoli containing samples to matched controls. Plotted data represents the mean, standard deviation, and triplicate data points over time. Data is representative of at least three independent experiments. (b) DFHBI-1T tracking over extended time course assays in plate readers. OD426 was monitored over time, and DFHBI-1T concentration was calculated by normalising to media OD426, subtracting the cellular OD426 contribution, and converting the resultant DFHBI-1T OD426 from absorbance to concentration via its extinction coefficient (see **Methods**). (c) Flow cytometric analysis of ribosome abundance. DH10 $\beta$  cells were grown as in panel (a) and aliquots were removed at 3 h (log phase) and 20 h (stationary phase) for flow cytometric analysis. DFHBI-1T was added to all samples (200  $\mu$ M) and green fluorescence was quantified for cells with and without Broccoli, the latter used to normalise fluorescence for the former. Data represents the mean and standard deviation of a triplicate dataset. WT, poRiboT2; C888, poRiboT2\_C888::Broccoli.
